# Supplementary material for: Stressful Life Events, Unhealthy Eating Behaviors and Obesity among Chinese Government Employees: A Follow-Up Study
Source: MDPI journal article supplement (doi:10.3390/nu15112637), 2023-06-05
Supplement: s1 [file s1]

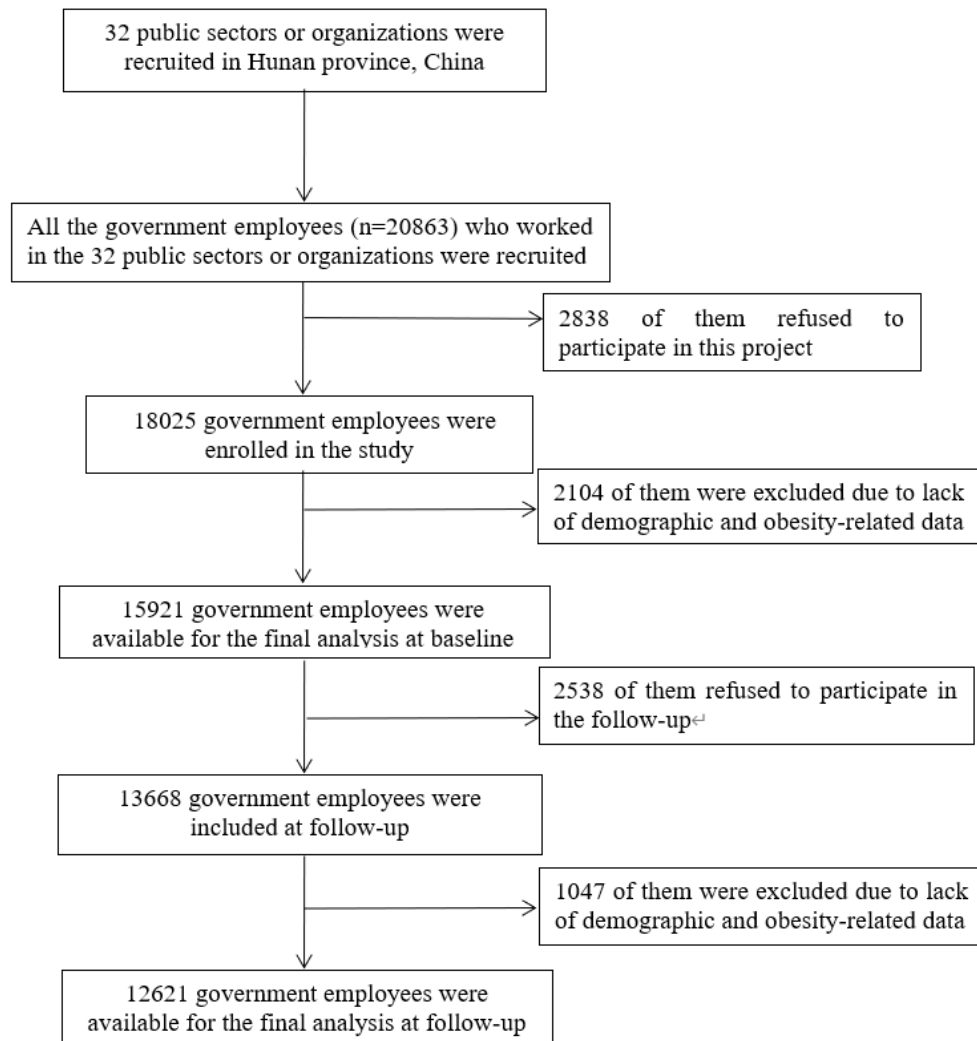

**Figure S1 Inclusion process for the participants**

Table S1. characteristics of different unhealthy eating behavior

|                                     | Baseline( <i>n</i> =15,921) |       | Follow-up ( <i>n</i> =12,642) |       |
|-------------------------------------|-----------------------------|-------|-------------------------------|-------|
|                                     | n                           | %     | n                             | %     |
| Irregular meal timing               |                             |       |                               |       |
| No                                  | 8632                        | 54.2% | 6839                          | 54.2% |
| Sometimes                           | 5766                        | 36.2% | 4572                          | 36.2% |
| Often                               | 1523                        | 9.6%  | 1210                          | 9.6%  |
| Overeating at each mealtime         |                             |       |                               |       |
| No                                  | 14952                       | 93.9% | 11909                         | 94.4% |
| Sometimes                           | 969                         | 6.1%  | 712                           | 5.6%  |
| Often                               | -                           | -     | -                             | -     |
| Eating before going to bed at night |                             |       |                               |       |
| No                                  | 8353                        | 52.5% | 6916                          | 54.8% |
| Sometimes                           | 7021                        | 44.1% | 5304                          | 42.0% |
| Often                               | 547                         | 3.4%  | 401                           | 3.2%  |
| Eating out                          |                             |       |                               |       |
| No                                  | 13936                       | 87.5% | 11184                         | 88.6% |
| Sometimes                           | 1732                        | 10.9% | 1258                          | 10.0% |
| Often                               | 253                         | 1.6%  | 179                           | 1.4%  |

Table S2. Baseline characteristics of different type stressful life events

| Type of life events                 | Item                                            | N    | %    |
|-------------------------------------|-------------------------------------------------|------|------|
| Events related to family & marriage |                                                 | 7115 | 56.3 |
|                                     | In love or engagement                           | 1569 | 12.4 |
|                                     | Broken love                                     | 599  | 4.7  |
|                                     | Get married                                     | 719  | 5.7  |
|                                     | Pregnancy or wife pregnancy                     | 1863 | 14.7 |
|                                     | Miscarriage by yourself or wife                 | 586  | 4.6  |
|                                     | Add new members to the family                   | 1711 | 13.5 |
|                                     | Discord with spouse's parents                   | 1433 | 11.3 |
|                                     | Bad relationship between spouse                 | 1250 | 9.9  |
|                                     | Husband and wife separated due to discord       | 410  | 3.2  |
|                                     | Unsatisfied sex life                            | 1009 | 8.0  |
|                                     | Separation from spouse due to work demands      | 1300 | 10.3 |
|                                     | Spouse has an affair                            | 119  | 0.9  |
|                                     | Marital relationship becomes better             | 767  | 6.1  |
|                                     | Violation of one child policy                   | 37   | 0.3  |
|                                     | Yourself or your spouse undergo sterilization   | 102  | 0.8  |
|                                     | Death of spouse                                 | 43   | 0.3  |
|                                     | Divorce                                         | 152  | 1.2  |
|                                     | Failure of children's advancement or employment | 154  | 1.2  |
|                                     | Difficulties in child discipline                | 1072 | 8.5  |
|                                     | Children leave home for a long time             | 314  | 2.5  |
|                                     | Parental discord                                | 507  | 4.0  |
|                                     | Family member seriously ill/ injured            | 742  | 5.9  |
|                                     | Death of family member                          | 529  | 4.2  |

|                                                |                                                   |      |      |
|------------------------------------------------|---------------------------------------------------|------|------|
|                                                | Go abroad for the first time                      | 308  | 2.4  |
|                                                | Friends seriously ill/ injured                    | 226  | 1.8  |
|                                                | Friend died                                       | 223  | 1.8  |
| Events related to work                         |                                                   | 5255 | 41.6 |
|                                                | Unemployed                                        | 131  | 1.0  |
|                                                | Start working                                     | 602  | 4.8  |
|                                                | Deduction of bonuses and fines                    | 867  | 6.9  |
|                                                | Outstanding personal achievement                  | 449  | 4.1  |
|                                                | Promotion                                         | 961  | 7.6  |
|                                                | Not satisfied with the current job                | 1874 | 14.8 |
|                                                | Work stress                                       | 3600 | 28.5 |
|                                                | Poor relationship with superiors                  | 670  | 5.3  |
|                                                | Discord with colleagues or neighbors              | 281  | 2.2  |
|                                                | Retired or did not arrange a specific job         | 97   | 0.8  |
|                                                | Examination failed                                | 54   | 0.4  |
| Events related to economic problems            |                                                   | 2625 | 20.8 |
|                                                | Family financial difficulties                     | 921  | 7.3  |
|                                                | In debt                                           | 1361 | 10.8 |
|                                                | The economic situation has improved significantly | 1110 | 8.8  |
|                                                | Housing shortage                                  | 482  | 3.8  |
| Events related to accidents and legal disputes |                                                   | 1378 | 10.9 |
|                                                | Misunderstood, blamed, false accusation, argument | 1024 | 8.1  |
|                                                | Theft, property damage                            | 252  | 2.0  |
|                                                | Unexpected frights, accidents, natural disasters  | 202  | 1.6  |
|                                                | Intervene in civil legal disputes                 | 182  | 1.4  |
|                                                | Detained, tried                                   | 41   | 0.3  |
| Events related to health                       |                                                   | 1109 | 8.8  |
|                                                | Lifestyle changes                                 | 980  | 7.8  |
|                                                | Seriously ill/injured                             | 181  | 1.4  |
